# Supplementary material for: Using machine learning of clinical data to diagnose COVID-19: a systematic review and meta-analysis
Source: Springer Nature journal article supplement (doi:10.1186/s12911-020-01266-z), 2020-09-29
Supplement: MOESM2 [file 18429652]

**Table S2: Significativity of ANOVA tests for SOM**

| Clinical Variable                                        | Significativity |
|----------------------------------------------------------|-----------------|
| Age                                                      | ***             |
| Sex                                                      | ***             |
| Region                                                   | ***             |
| Community Transmission                                   | **              |
| Number of family members infected                        | **              |
| Neutrophil x10 <sup>9</sup> L                            | **              |
| Neutrophil level                                         | ***             |
| Serum levels of white blood cell x10 <sup>9</sup> L      | **              |
| Serum levels of white blood cell level                   | ***             |
| Lymphocytes                                              | ***             |
| Lymphocytes level                                        | ***             |
| Platelets                                                | **              |
| C reactive protein levels                                | ***             |
| C reactive protein levels high low                       | ***             |
| Eosinophils                                              | **              |
| Red blood cells                                          |                 |
| Hemoglobin                                               | **              |
| Procalcitonin ng dL                                      | **              |
| Duration of illness (Days)                               | ***             |
| Days to death                                            | ***             |
| Days before symptoms appear (Incubation)                 | **              |
| Number of CT scan published                              | **              |
| CT scan results - Pos Neg                                | ***             |
| Number of chest x rays published                         | **              |
| RT PCR results                                           | ***             |
| X ray results Pos Neg                                    | **              |
| Risk factors (Diabetes, Hypertension, gene alleles) etc. | ***             |
| Smoking                                                  | ***             |
| Number of affected lobes                                 |                 |
| GGO ground glass opacity                                 | ***             |
| Before symptoms appear incubation                        | ***             |
