# Supplementary material for: Using machine learning of clinical data to diagnose COVID-19: a systematic review and meta-analysis
Source: Springer Nature journal article supplement (doi:10.1186/s12911-020-01266-z), 2020-09-29

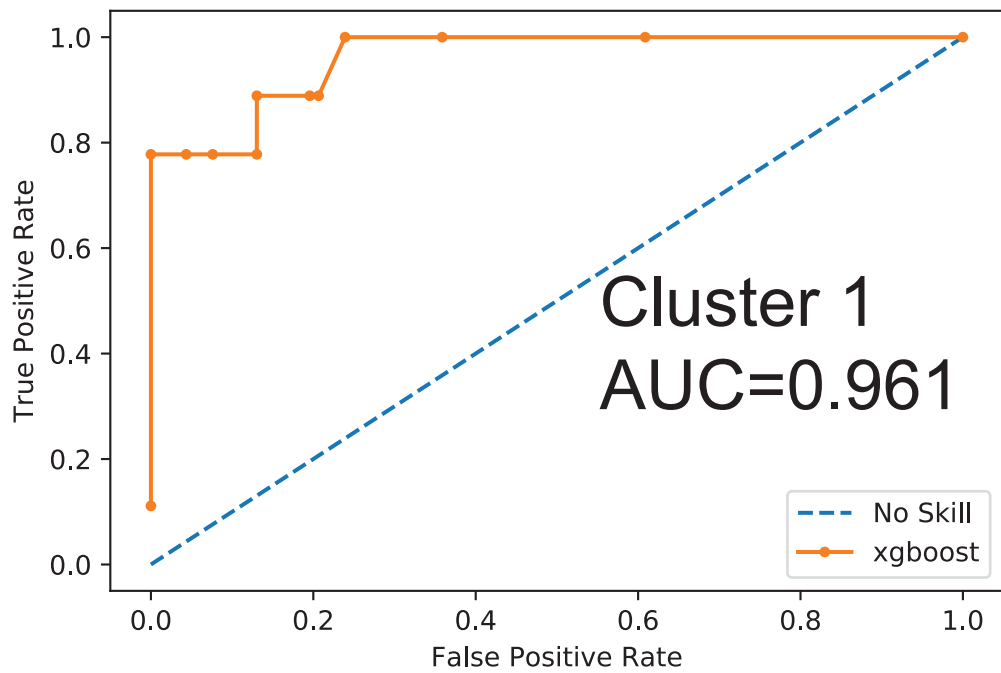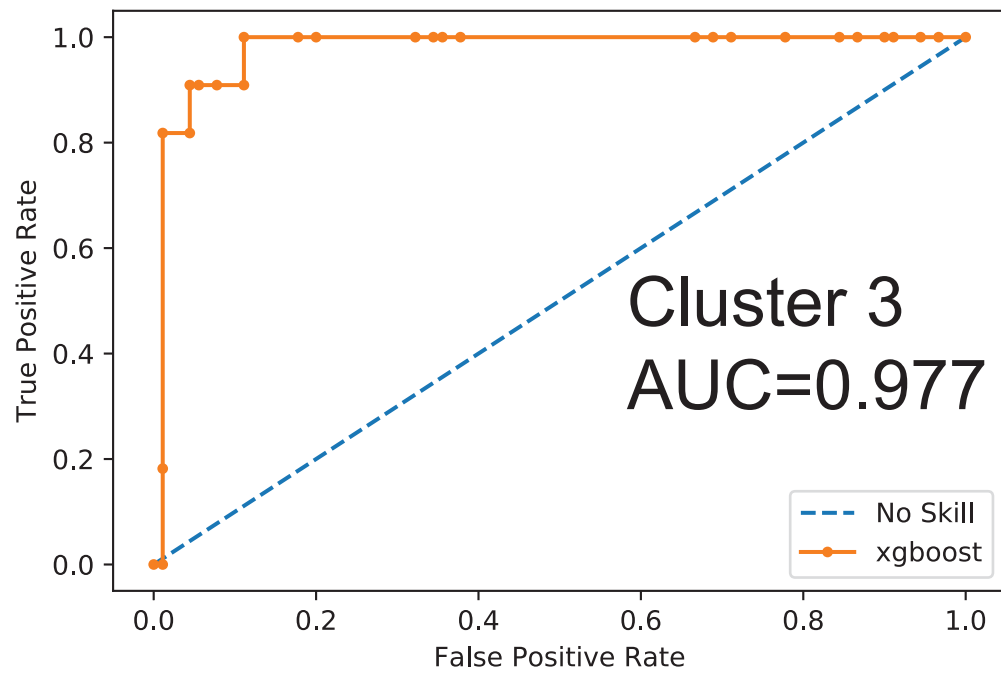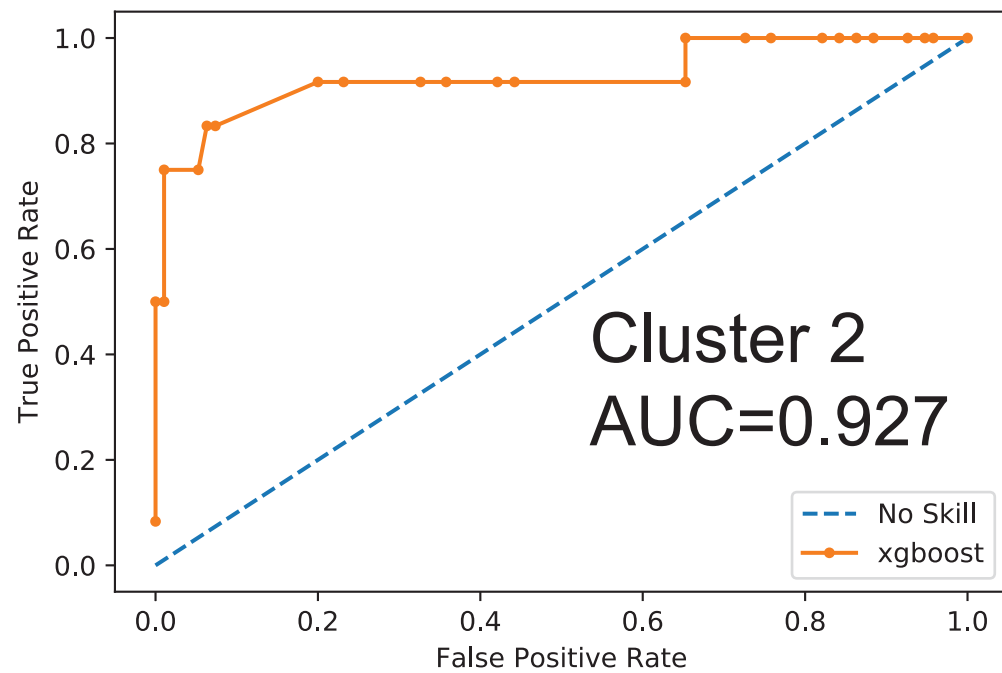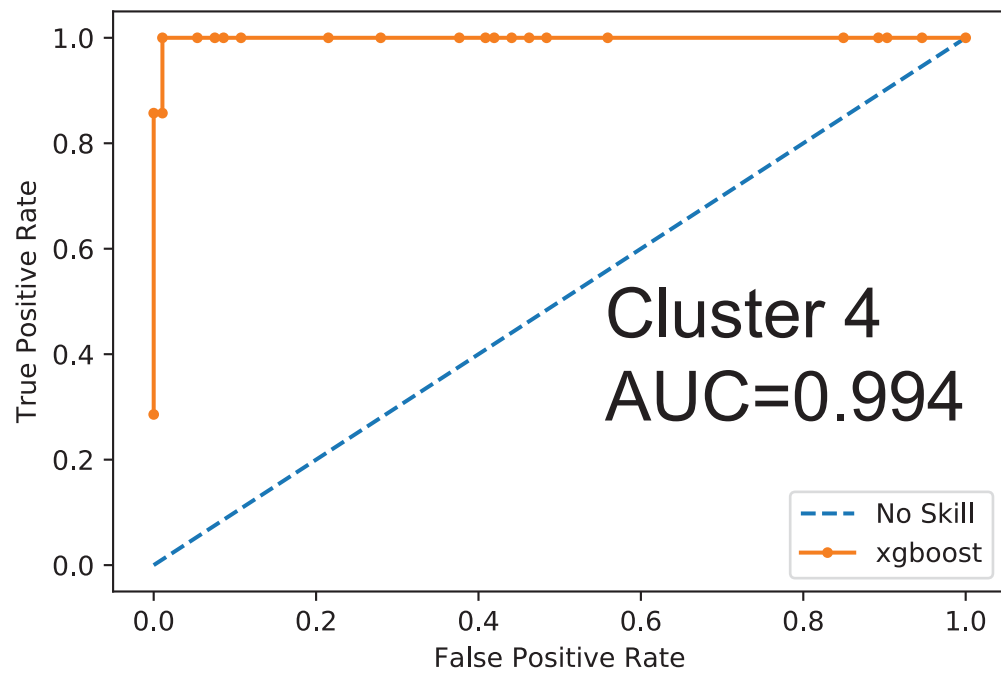

Supplement: MOESM6 [file 18429652]
